# Supplementary material for: Dietary and Nutraceutical Interventions as an Adjunct to Non-Surgical Periodontal Therapy—A Systematic Review
Source: MDPI journal article supplement (doi:10.3390/nu15061538), 2023-03-22
Supplement: s1 [file s1]

## Supplementary

Supplementary Table S1: Excluded studies according to full text analysis.

| Author, year                    | Literature search | Reason for exclusion |
|---------------------------------|-------------------|----------------------|
| Kondo et al. (2014)             | E                 | N2                   |
| Fridell et al. (2017)           | E                 | N1                   |
| El-Shinnawi et al. (2015)       | E                 | N3                   |
| Woelber et al. (2016)           | E                 | N1                   |
| Uhrbom et al. (1984)            | E                 | N1                   |
| Cocate et al. (2019)            | E                 | N2                   |
| Al-Ahmad et al. (2010)          | E                 | N1                   |
| Melcher et al. (1953)           | E                 | N3                   |
| Wozniewicz et al. (2018)        | E                 | N5                   |
| Isola et al. (2020)             | E                 | N3                   |
| Fourel et al. (1972)            | E                 | N3                   |
| Silvestrini et al. (1954)       | E                 | N3                   |
| Dawson et al. (2014)            | E                 | N3                   |
| Lau et al. (2013)               | E                 | N3                   |
| Martinez-Herrera (et al. (2018) | E                 | N2                   |
| Mamae-Chomata et al. (1979)     | E                 | N3                   |
| Leggott et al. (1991)           | E                 | N1                   |
| Maruhashi et al. (1983)         | E                 | N3                   |
| Rasperini et al. (2019)         | E                 | N1                   |
| Harpenau et al. (2011)          | E                 | N1                   |
| Neiva et al. (2003)             | E                 | N3                   |
| Leger et al. (1965)             | E                 | N3                   |
| Bradford et al. (1959)          | E                 | N3                   |
| Cheraskin et al. (1988)         | E                 | N1                   |
| Zare Javid et al. (2018)        | E                 | N2                   |
| Zare Javid et al. (2019)        | E                 | N2                   |
| Zare Javid et al. (2014)        | E                 | N6                   |
| Yano et al. (1979)              | E                 | N3                   |
| Nahum et al. (1966)             | E                 | N3                   |
| Ringsdorf et al. (1962)         | E                 | N1                   |
| El-Sharkawy et al. (2019)       | E                 | N2                   |
| Coates et al. (2017)            | E                 | N1                   |
| Chapple et al. (2019)           | E                 | N4                   |
| Babei et al. (2018)             | E                 | N6                   |
| De Angelis et al. (2020)        | E                 | N6                   |

*Note:* E= Electronic literature search, N1= not controlled and/or randomized, N2= no general healthy subjects, N3= journal articles, N4=not blinded, N5= no periodontal indices (PD/CAL), N6= missing data.

Supplementary Table S2: Data of the meta-analysis including all studies providing values of difference between baseline and three months follow up: (a) PPD, (b) CAL, (c) BOP

(a)

| Study                           | SMD    | 95% Conf. Interval |        | % Weight |
|---------------------------------|--------|--------------------|--------|----------|
| Staño et al. (2020), Omega-3    | 1.357  | 0.557              | 2.158  | 24.98    |
| Arora_et al. (2013), Lycopene   | 0.000  | -0.605             | 0.605  | 25.15    |
| Chopra et al. (2016), Green tea | 7.117  | 6.119              | 8.114  | 24.75    |
| Graziani et al. (2018), Kiwi    | -1.629 | -2.272             | -0.986 | 25.12    |
| D+L pooled SMD                  | 1.691  | -1.440             | 4.823  | 100.00   |

Heterogeneity chi-squared = 217.15 (d.f. = 3), p = 0.000

I-squared (variation in SMD attributable to heterogeneity) = 98.6%

Estimate of between-study variance Tau-squared = 10.053

Test of SMD=0 : z = 1.06; p = 0.290

(b)

| Study                           | SMD    | 95% Conf. Interval |        | % Weight |
|---------------------------------|--------|--------------------|--------|----------|
| Staño et al. (2020), Omega-3    | 2.715  | 1.705              | 3.725  | 24.80    |
| Arora_et al. (2013), Lycopene   | 2.709  | 1.862              | 3.557  | 24.98    |
| Chopra et al. (2016), Green tea | 5.203  | 4.433              | 5.974  | 25.06    |
| Graziani et al. (2018), Kiwi    | -1.714 | -2.366             | -1.062 | 25.16    |
| D+L pooled SMD                  | 2.223  | -1.008             | 5.454  | 100.00   |

Heterogeneity chi-squared = 194.04 (d.f. = 3), p = 0.000

I-squared (variation in SMD attributable to heterogeneity) = 98.5%

Estimate of between-study variance Tau-squared = 10.692

Test of SMD=0 : z = 1.35; p = 0.178

(c)

| Study                         | SMD    | 95% Conf. Interval |        | % Weight |
|-------------------------------|--------|--------------------|--------|----------|
| Staño et al. (2020), Omega-3  | -0.637 | -1.374             | 0.099  | 33.53    |
| Arora_et al. (2013), Lycopene | 3.236  | 2.304              | 4.168  | 33.29    |
| Graziani et al. (2018), Kiwi  | -4.183 | -5.187             | -3.180 | 33.18    |
| D+L pooled SMD                | -0.525 | -4.372             | 3.323  | 100.00   |

Heterogeneity chi-squared = 113.44 (d.f. = 2), p = 0.000

I-squared (variation in SMD attributable to heterogeneity) = 98.2%

Estimate of between-study variance Tau-squared = 11.352

Test of SMD=0 : z = 0.27; p = 0.789

**Supplementary Figure S1:** Forest plots for the outcomes of (a) PPD, (b) CAL and (c) BOP.

(a)

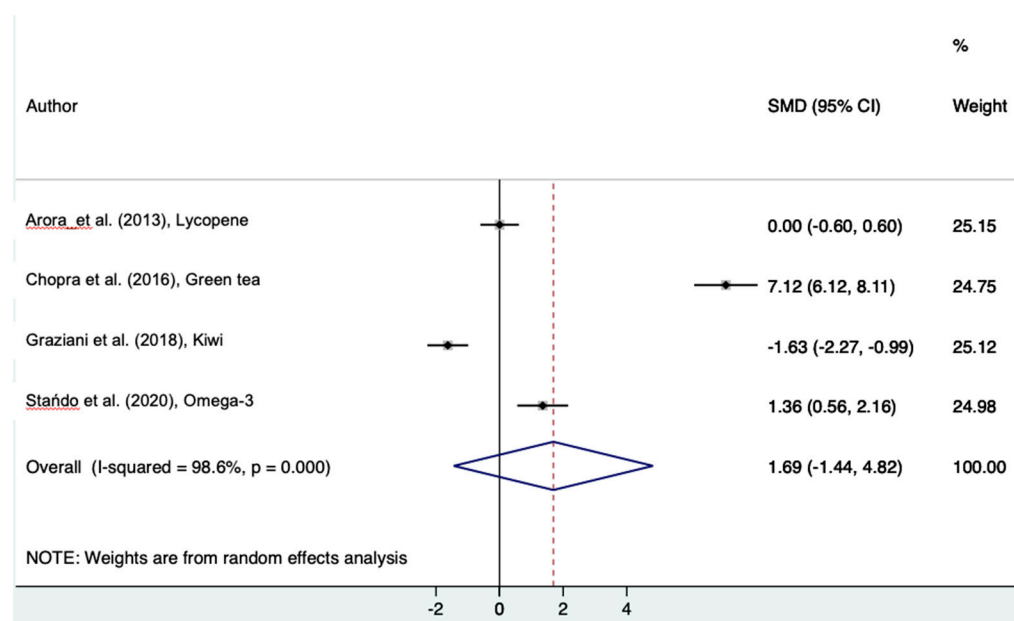

(b)

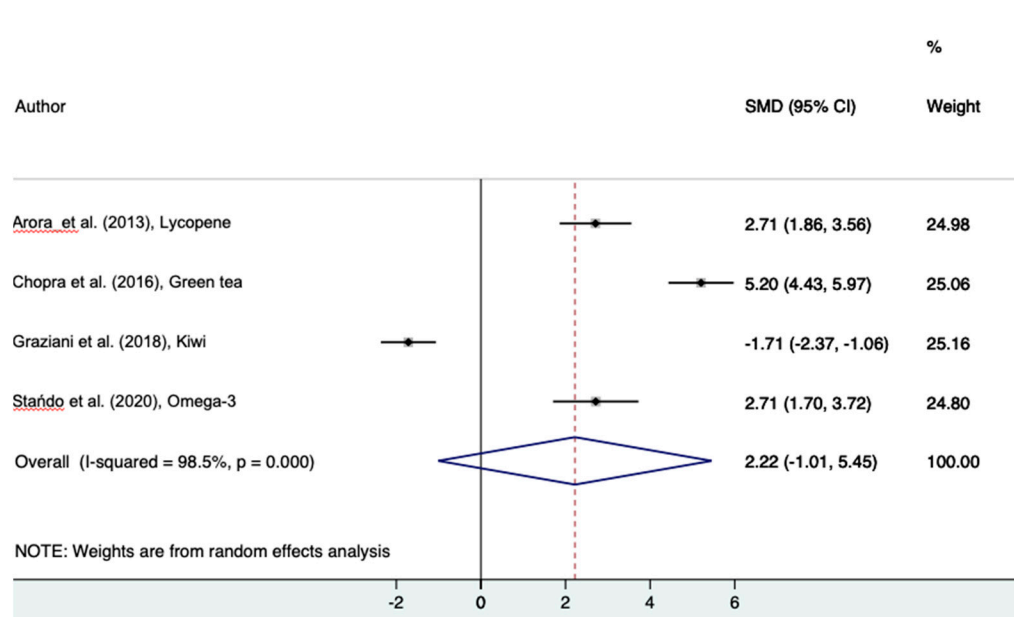

(c)

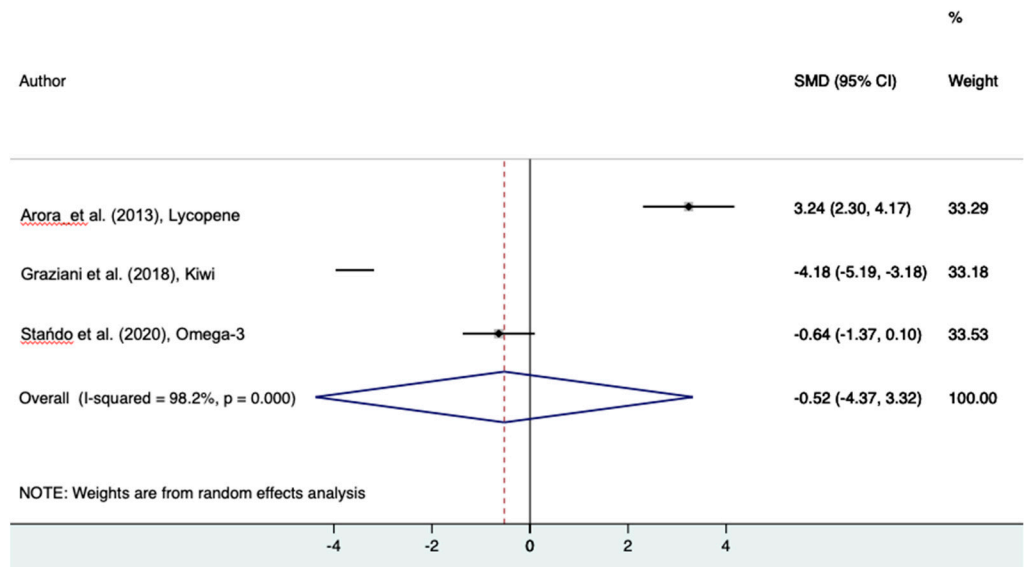

**Supplementary Table S3:** Comparison of supplemented micronutrients and food intake possibilities; Source: <https://fdc.nal.usda.gov/>

| Study                       | Intervention (daily)                                                                                                                                                                        | foods (daily)                                                                                                                                                                                                                |
|-----------------------------|---------------------------------------------------------------------------------------------------------------------------------------------------------------------------------------------|------------------------------------------------------------------------------------------------------------------------------------------------------------------------------------------------------------------------------|
| <b>Arora et al. (2013)</b>  | 8 mg Lycopene,<br>10,000 IU vitamin A,<br>40 IU $\beta$ -tocopherol,<br>200 mg vitamin C,<br>109.8 mg zinc sulfate monohydrate, equivalent to 24.96 mg zinc<br>280 $\mu$ g selenium dioxide | 11 g tomato paste or ripe vine tomato (approx. 115 g)<br>120 g carrots (provitamin A) or 125 g liver<br>135 g raw chicory<br>105 g red bell pepper, raw<br>220 g beef or 400 g pumpkin seeds<br>5 Brazil nuts (approx. 20 g) |
| <b>Babaei et al. (2018)</b> | 2 g chicory extract: phenols (96.4 mg/g) and flavonoids (17.4 mg/g)                                                                                                                         | 11 g blueberries                                                                                                                                                                                                             |
| <b>Kecili et al. (2019)</b> | 400 $\mu$ g of folate                                                                                                                                                                       | 200g oat flakes<br>100g spinach<br>100g broccoli                                                                                                                                                                             |
| <b>Nafade et al. (2022)</b> | Oolong tea (appr. 99.32 mg polyphenols)                                                                                                                                                     |                                                                                                                                                                                                                              |

|                               |                                                                                                                                                                                                                                                                               |                                                                                                                                                                                                                                         |
|-------------------------------|-------------------------------------------------------------------------------------------------------------------------------------------------------------------------------------------------------------------------------------------------------------------------------|-----------------------------------------------------------------------------------------------------------------------------------------------------------------------------------------------------------------------------------------|
| <b>Chapple et al. (2012)</b>  | 7.5 mg $\beta$ -carotene, 46 mg vitamin E, 200 mg vitamin C<br>400 $\mu$ g folic acid + polyphenols (no information about the amount)<br>or<br>7.5 mg $\beta$ -carotene, 66 mg vitamin E, 222 mg vitamin C and 640 $\mu$ g folic acid + polyphenols (quantity not specified). | 88 g sweet potatoes, 31 g wheat germ oil, 215 g kiwi fruit.<br>276 g lamb's lettuce + polyphenols from e.g. green tea<br>88 g sweet potatoes, 45 g wheat germ oil, 239 g kiwi<br>441 g lamb's lettuce + polyphenols from e.g. green tea |
| <b>Chopra et al. (2016)</b>   | Green tea (40-150 mg polyphenols and flavonoids)                                                                                                                                                                                                                              | -                                                                                                                                                                                                                                       |
| <b>Graziani et al. (2017)</b> | 2 kiwi fruits, approx. 140 mg vitamin C                                                                                                                                                                                                                                       | -                                                                                                                                                                                                                                       |
| <b>Deore et al. (2014)</b>    | 300 mg tablet with omega-3 fatty acids (180 mg EPA and 120 mg DHA)                                                                                                                                                                                                            | 10 g herring, alternatively algae oil depending on the Omega-3 concentration                                                                                                                                                            |
| <b>Keskiner et al. (2017)</b> | 6.25 mg EPA and 19.19 mg DHA                                                                                                                                                                                                                                                  | 0.85 g herring, alternatively algae oil depending on the Omega-3 concentration                                                                                                                                                          |
| <b>Martinez et al. (2014)</b> | 900 mg tablet with omega-3 fatty acids (540 mg EPA and 360 mg DHA)                                                                                                                                                                                                            | 30 g herring, alternatively algae oil depending on the Omega-3 concentration                                                                                                                                                            |
| <b>Gao et al. (2020)</b>      | 2000 IU vitamin D3 corresponds to 50 $\mu$ g or 1000 IU vitamin D3 equivalent to 25 $\mu$ g                                                                                                                                                                                   | 200 g herring<br>100 g herring                                                                                                                                                                                                          |
| <b>Peric et al. (2020)</b>    | Approx. 3570 IU vitamin D3 (25,000 IU / week) corresponds to 94 $\mu$ g                                                                                                                                                                                                       | 376 g herring                                                                                                                                                                                                                           |
| <b>Stańdo et al. (2020)</b>   | 2.6g EPA, 1.8g DHA, 1.4g alkylglycerol, 1.4g squalene, 240 $\mu$ g vitamin A, 2 $\mu$ g vitamin D3                                                                                                                                                                            | 147 g herring,<br>18g carrots (provitamin A) or 18.9g Liver                                                                                                                                                                             |
| <b>Singh et al. (2014)</b>    | 200 mg vitamin E                                                                                                                                                                                                                                                              | 150 g almonds + 60g weat germ oil + 100 g peanuts + 100 g spinach                                                                                                                                                                       |
